# Supplementary material for: C‐terminal Src kinase‐mediated EPIYA phosphorylation of Pragmin creates a feed‐forward C‐terminal Src kinase activation loop that promotes cell motility
Source: PubMed Central journal article supplement — Cancer Sci. 2016 Jun 13;107(7):972–80. doi: 10.1111/cas.12962 (PMC4946704; doi:10.1111/cas.12962), 2016-06-13
Supplement: CAS-107-0972-s001.pdf [file CAS-107-0972-s001.pdf]

## Supporting Information

### Supporting Materials and Methods

**Pragmin Purification.** *Escherichia coli* Rosetta2 (DE3) was transformed with pGEX6P2-Pragmin-WT-His or pGEX6P2-Pragmin-Y391F-His and was cultured with LB medium. Protein expression was induced by addition of 0.1 mM isopropyl-1-thio- $\beta$ -D-galactopyranoside (IPTG) and additional culture at 18°C for 16 h. GST-fused Pragmin-WT-His or GST-fused Pragmin-Y391F-His was purified using Ni Sepharose excel (GE Healthcare). Ni-binding buffer is (8 mM Na<sub>2</sub>HPO<sub>4</sub>, 1.5 mM KH<sub>2</sub>PO<sub>4</sub>, 2.7 mM KCl, 400 mM NaCl, 0.1% TritonX-100, 0.3 mg/ml Benzamidine). Ni-wash buffer is (8 mM Na<sub>2</sub>HPO<sub>4</sub>, 1.5 mM KH<sub>2</sub>PO<sub>4</sub>, 2.7 mM KCl, 400 mM NaCl, 1% TritonX-100, 30 mM Imidazole). Ni-elution buffer is (8 mM Na<sub>2</sub>HPO<sub>4</sub>, 1.5 mM KH<sub>2</sub>PO<sub>4</sub>, 2.7 mM KCl, 400 mM NaCl, 500 mM Imidazole). For tyrosine-phosphorylated Pragmin Purification, *E. coli* BL21 (DE3) was co-transformed with pGEX6P2-Pragmin-WT-His or pGEX6P2-Pragmin-Y391F-His and pACYCDuet1-v-Src.<sup>(28)</sup> Subsequent procedure was same as non-phosphorylated Pragmin. However, Ni-binding buffer contained 0.2 mM Na<sub>3</sub>VO<sub>4</sub>.

**Csk Purification.** *E. coli* BL21 (DE3) was transformed with pGEX6P2-Csk-WT-His and was cultured with LB medium. Protein expression was induced by addition of 0.1 mM IPTG and additional culture at 25°C for 16 h. GST-fused Csk-His was purified using Glutathione Sepharose 4B (GE Healthcare). GST-binding buffer is (25 mM Tris-HCl, pH 7.5, 150 mM NaCl, 5 mM EDTA, 10 mM  $\beta$ -mercaptoethanol, 0.3 mg/ml Benzamidine). GST-wash buffer-W1 is (25 mM Tris-HCl, pH 7.5, 150 mM NaCl, 1% TritonX-100, 10 mM  $\beta$ -mercaptoethanol). GST-wash buffer-W2 is (50 mM Tris-HCl, pH 7.5, 150 mM NaCl, 10 mM

$\beta$ -mercaptoethanol). Then GST tag was excised by treating the GST-Csk-His protein with PreScission Protease (GE Healthcare).

**Src-tail Purification.** *E. coli* BL21 (DE3) was transformed with pGEX6P2-Src-tail and cultured with LB medium. Protein expression was induced by addition of 0.4 mM IPTG for 7 h at 37°C. GST-fused Src-tail was purified using Glutathione Sepharose 4B (GE Healthcare). GST-binding buffer is (50 mM Tris-HCl, pH 7.3, 150 mM NaCl, 5 mM EDTA, 2 mM DTT). GST-elution buffer is (50 mM Tris-HCl, pH 7.3, 150 mM NaCl, 5 mM EDTA, 2 mM DTT, 20 mM Glutathione).

Table S1. Expression vectors used in this study.

---

| Expression vectors                                          |
|-------------------------------------------------------------|
| Mammalian expression vectors                                |
| pCMV-Myc-Pragmin-WT                                         |
| pCMV-Myc-Pragmin-1-829 amino acid residues                  |
| pCMV-Myc-Pragmin-830-1368 amino acid residues               |
| pCMV-Myc-Pragmin-Y391F                                      |
| pCMV-Myc-Pragmin-K997R                                      |
| pCMV-Myc-Pragmin-Y66/119/146/238/343/368/391/465/ 599F (9F) |
| pCMV-Myc-Pragmin-Y66/119/146F                               |
| pCMV-Myc-Pragmin-Y238/343/368F                              |
| pCMV-Myc-Pragmin-Y391/465/599F                              |
| pCMV-Myc-Pragmin-Y238F                                      |
| pCMV-Myc-Pragmin-Y343F                                      |
| pCMV-Myc-Pragmin-Y368F                                      |
| pCMV-Myc-Pragmin-Y238/391F                                  |
| pCMV-Myc-Pragmin-Y343/391F                                  |
| pCMV-Myc-Pragmin-Y368/391F                                  |
| pCMV-Myc-Pragmin-Y238/343/391F                              |
| pSP65SR $\alpha$ -Csk-WT-Flag                               |
| pSP65SR $\alpha$ -Csk-K222R-Flag                            |
| Bacterial Expression Vectors                                |
| pGEX6P2-Pragmin-WT-His                                      |
| pGEX6P2-Pragmin-Y391F-His                                   |
| pGEX6P2-Csk-WT-His                                          |
| pGEX6P2- c-Src-524-536 amino acid residues                  |
| pACYCDuet1-v- <i>Src</i>                                    |

---

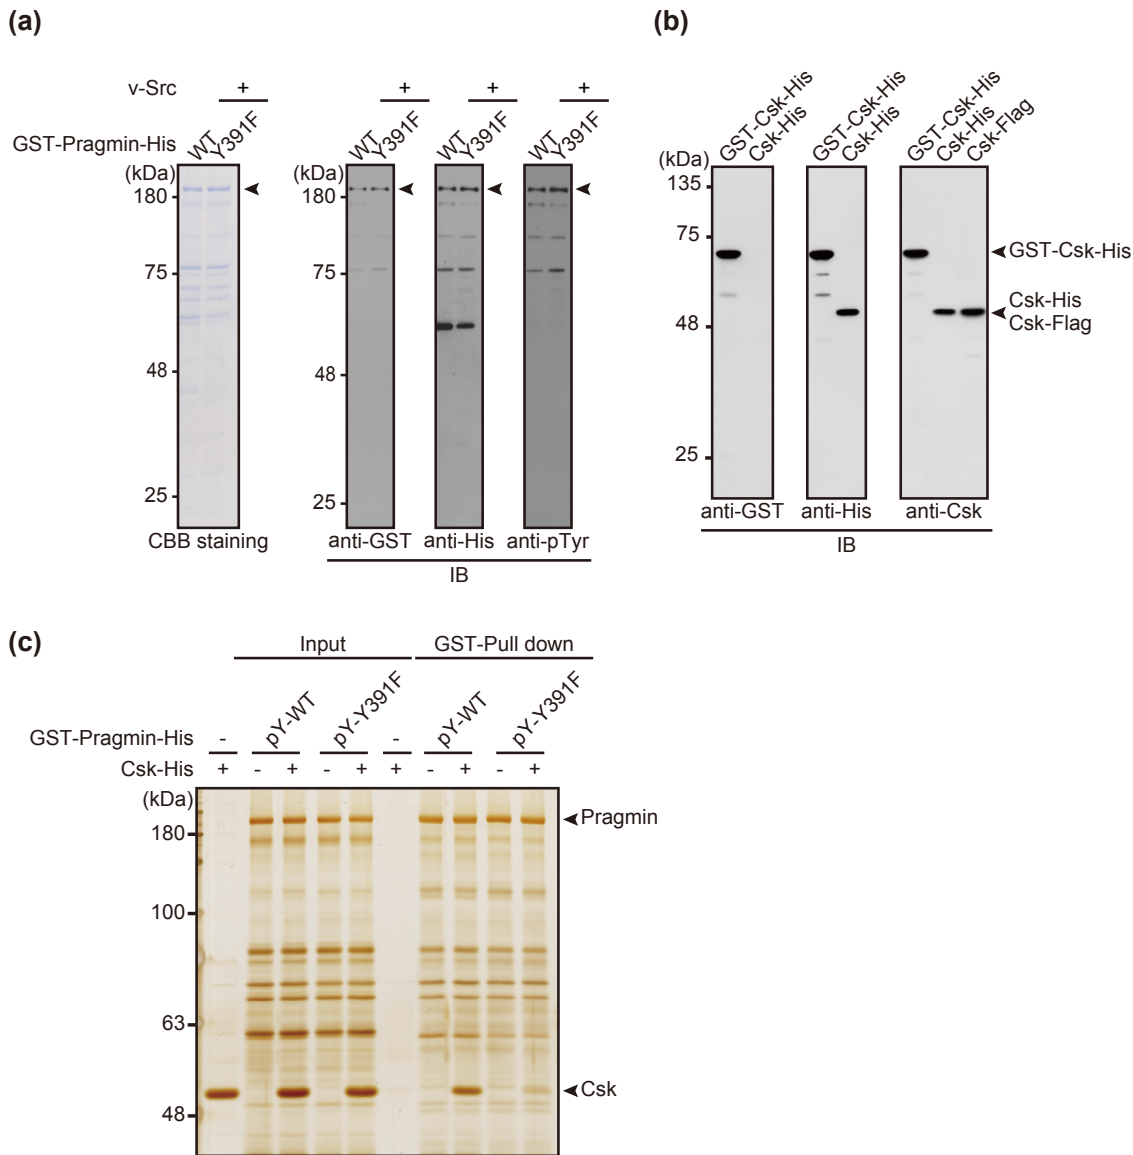

**Fig. S1. *In vitro* interaction of Pragmin with Csk.**

(a) CBB staining and IB analysis of recombinant tyrosine-phosphorylated GST-fused Pragmin proteins. Arrowheads indicate the positions of full-length GST-Pragmin-His. (b) IB analysis of recombinant Csk protein. Csk-Flag was expressed in AGS cells. (c) Silver staining analysis of GST pull-down assay using recombinant proteins. pY means tyrosine-phosphorylated.

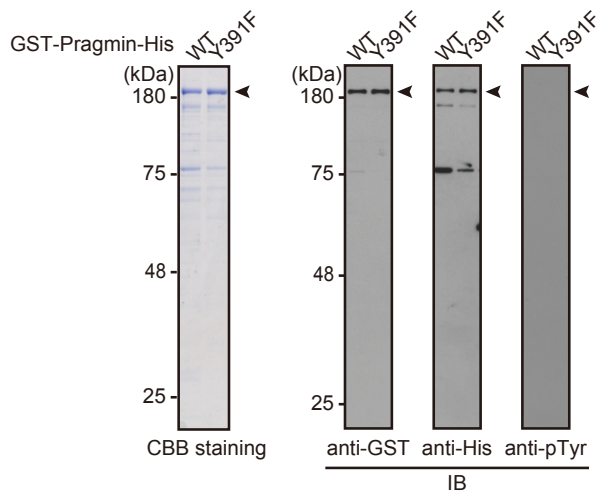

**Fig. S2. Purification of recombinant Pragmin.**

CBB staining and IB analysis of recombinant GST-fused Pragmin proteins. Arrowheads indicate the positions of full-length GST-Pragmin-His.

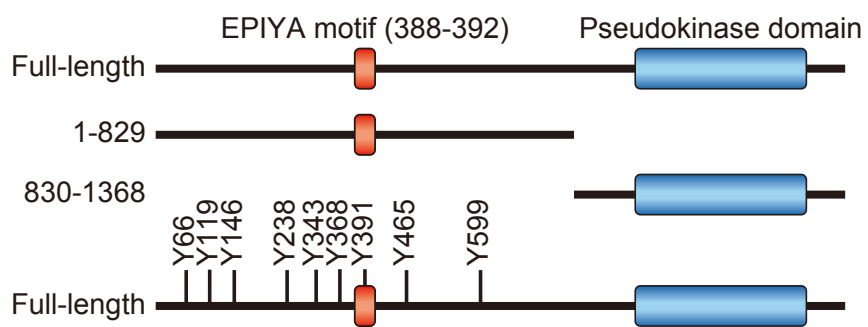

**Fig. S3. Schematic representation of full-length and truncated mutants of Pragmin.**
